# Supplementary material
Source: PubMed Central journal article supplement (PMC4387559)
Supplement: cr201531x3.pdf [file cr201531x3.pdf]

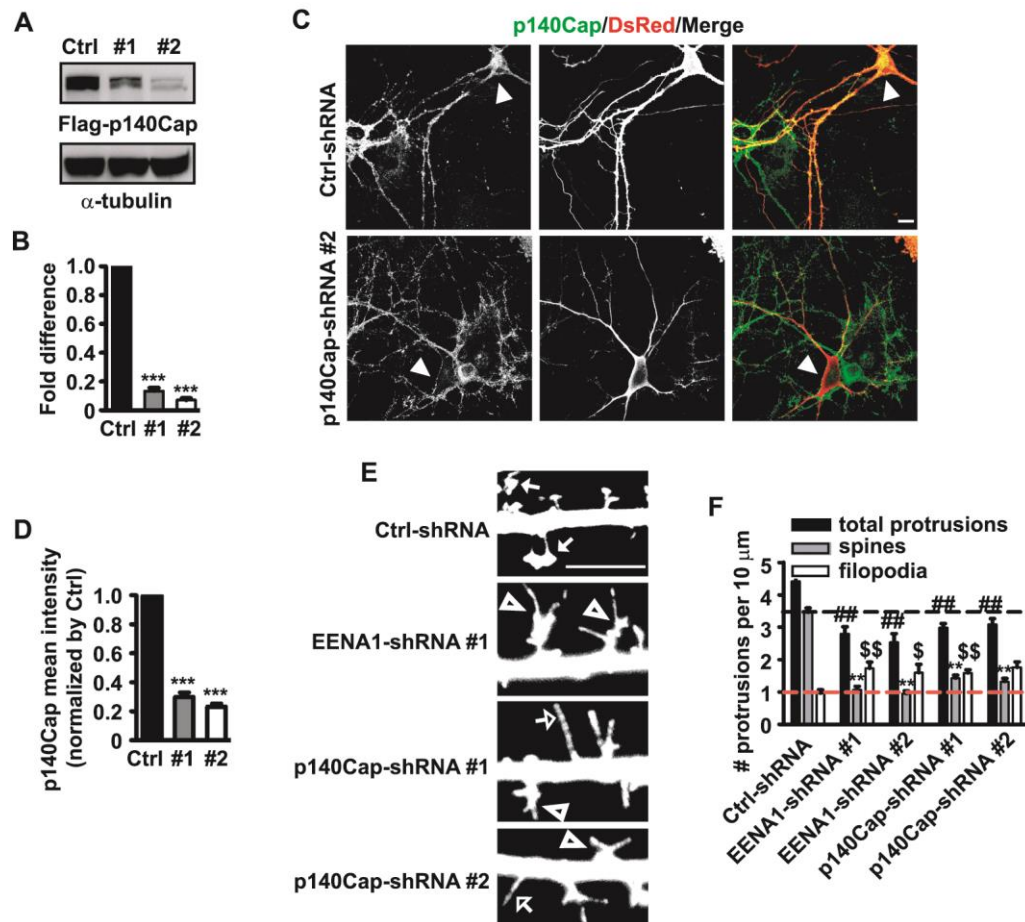

**Supplementary information, Figure S3** Similar effects of endophilin A1 and p140Cap knockdown on spine morphology.

**(A)** HEK293 cells were cotransfected with constructs expressing Flag-tagged p140Cap and shRNA targeting p140Cap for 48 h and lysed for immunoblotting analysis. **(B)** Quantification of p140Cap expression. Statistical test: \*\*\*  $P < 0.001$ ; one-way ANOVA followed by Dunnett's multiple-comparison post hoc tests.  $n = 3$  independent experiments. **(C)** Hippocampal neurons were transfected with shRNA constructs coexpressing DsRed and shRNA at DIV16-17 followed by immunostaining with antibodies to DsRed and p140Cap at DIV21. Shown are representative confocal images. Filled arrowheads, cell bodies of transfected neurons. Scale bar, 10  $\mu\text{m}$ . **(D)** Quantitative analysis of p140Cap mean intensity in transfected neurons. Statistical test: \*\*\*  $P < 0.001$ ; one-way ANOVA followed by Dunnett's multiple-comparison post hoc tests. All values are shown as mean  $\pm$  s.e.m. 20-25 neurons. **(E)** Representative images of cultured hippocampal neurons transfected with shRNA constructs

coexpressing shRNA and DsRed at DIV16-17 followed by immunostaining with antibodies to DsRed at DIV21. Arrows, spines; Open arrows, filopodia; open arrowheads, filopodia growing from existing spine heads. Scale bar, 5  $\mu$ m. **(F)**

Quantification of dendritic protrusion density of transfected neurons in **E**. (number of cells analyzed, Ctrl-shRNA: 31, EENA1-shRNA #1: 20, EENA1-shRNA #2: 15, p140Cap-shRNA #1: 33, p140Cap-shRNA #2: 26). In all, more than 600 protrusions were measured for each group. All values are shown as mean  $\pm$  s.e.m. Statistical test: ##  $P < 0.01$  (total protrusions), \*\*  $P < 0.01$  (spines), \$\$  $P < 0.01$ , \$  $P < 0.05$  (filopodia); one-way ANOVA followed by Dunnett's multiple-comparison post hoc tests.
